# Supplementary material for: Season-Dependent Synergism between the Male- Attractive Plant Volatile Benzaldehyde and the Sex Pheromone of the Oriental Fruit Moth, Grapholita molesta
Source: Research Square preprint supplement (doi:10.21203/rs.3.rs-6637201/v1), 2025-06-06
Supplement: Supplementary file 1 [file 46da3b85f9e01568088dd47c.docx]

**Supplemental Materials:**


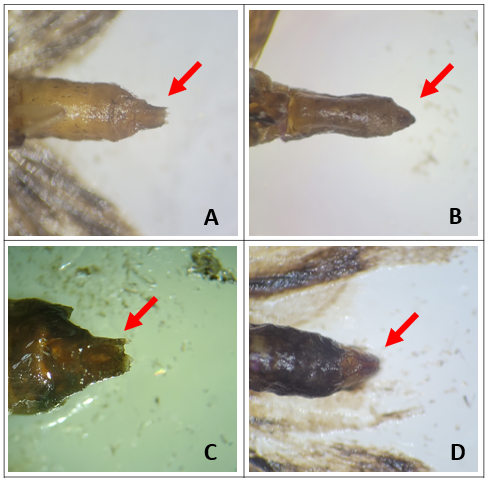


**S1 Figure.** Male genitalia (right) and female genitalia (left) of *G. molesta* (A, B) and *C. pomonella* (C, D).

**S1 Table: Average number of *C. pomonella* captured according to trapping period in 2021 and 2022.**

| **Lures** | **Total *C. pomonella* male captures** | | | |
| --- | --- | --- | --- | --- |
| **2021 (n=4)** | | **2022 (n=5)** | |
| Mid | Late | Early | Mid |
| BEN-VL | - | - | 0.2 | 1.6 |
| BEN-L | 0.25 | 0 | 0.6 | 0.8 |
| BEN-M | 0.75 | 0.75 | 0.6 | 1.8 |
| BEN-H | 0 | 0.75 | - | - |
| MEG | 0.25 | 0.75 | 1 | 2.6 |
| MEG + BEN-VL | - | - | 1 | 2.2 |
| MEG + BEN-L | 1.25 | 0.25 | 0.8 | 2 |
| MEG + BEN-M | 0.5 | 0.5 | 0.2 | 1.8 |
| MEG + BEN-H | 0.5 | 0.25 | - | - |
| Unbaited (Control) | 0 | 0 | 0 | 0 |
